# Supplementary material
Source: publisher site journal article supplement (http://static.cambridge.org/content/id/urn:cambridge.org:id:article:S1368980019001186/resource/name/S1368980019001186supp001.docx)
Supplement: Supplementary file 1 [file S1368980019001186supp001.docx]

**Supplemental Fig. S1** Communalities of items in the Panama FSQ during land preparation, growing and harvest seasons, for EFA models with (A) 3, (B) 4 and (C) 5 common factors. Communalities above the cut-off of 0.7 (shown by a heavy dotted line) are considered very good, communalities between 0.4 (shown by a lighter dotted line) and 0.69 are considered moderately good, and communalities below 0.4 are considered poor. The 5 factor model of the data from the growing season did not reach convergence and therefore communalities could not be calculated.
